# Supplementary material for: Climate and soil factors influencing seedling recruitment of plant species used for dryland restoration
Source: Copernicus journal article supplement (doi:10.5194/soil-2016-25), 2016-04-13
Supplement: Supplementary file 1 [file soil-2016-25-supplement.pdf]

## Supplementary material

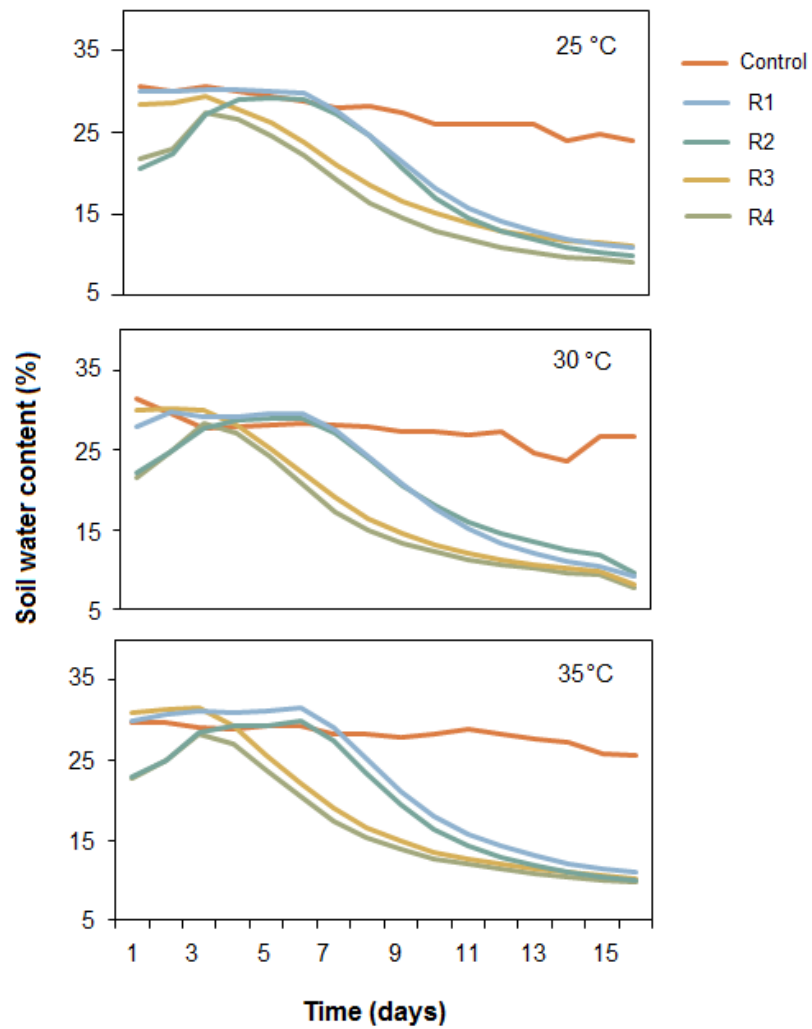

Figure S1. Variation in soil water content (%) with time (days) for climate scenarios ( $T=25, 30$  and  $35$  °C). Watering treatments (control, R1, R2, R3 and R4) as described in Table 1.

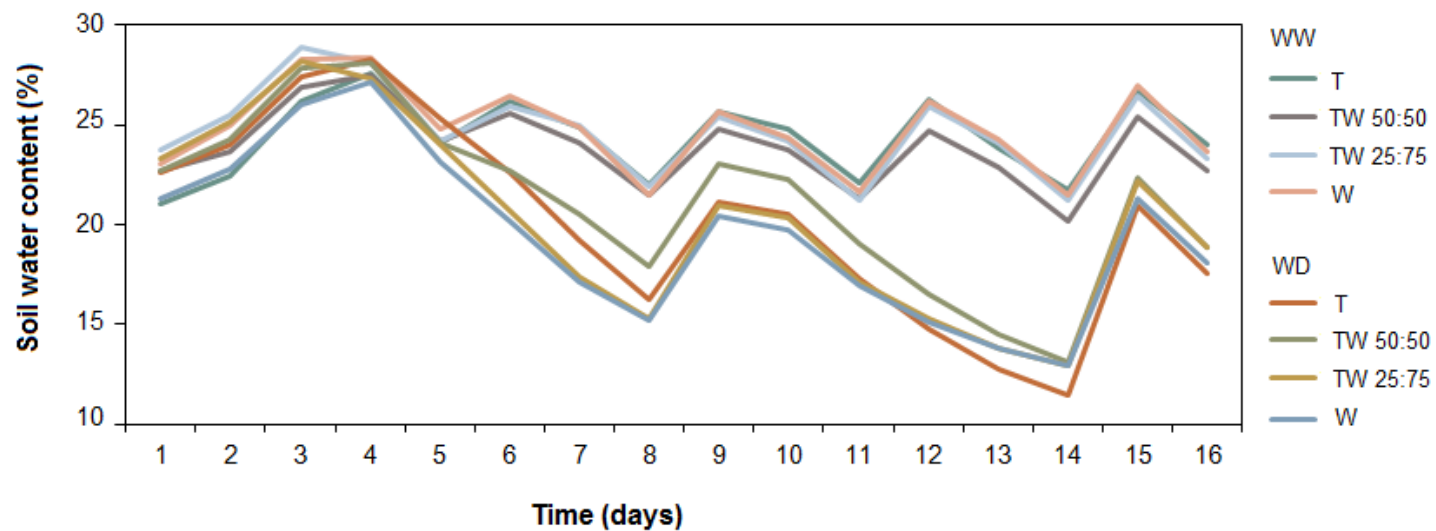

Figure S2. Variation in soil water content (%) with time (days) for different watering treatments (WW; well watered and WD: water deficit) and growth media types (T: 100% topsoil, TW 50:50: mix of topsoil and waste at 50:50 ratio, TW 25:75: mix of topsoil and waste at 75:25 ratio and W: 100% waste).
